# Supplementary material for: CX-5461 activates the DNA damage response and demonstrates therapeutic efficacy in high-grade serous ovarian cancer
Source: PubMed Central journal article supplement (PMC7251123; doi:10.1038/s41467-020-16393-4), 2020-05-26
Supplement: 41467_2020_16393_MOESM3_ESM.pdf [file 41467_2020_16393_MOESM3_ESM.pdf]

## **Description of Additional Supplementary Files**

File Name: Supplementary Data 1

Description: Gene list of HRD signature.

File Name: Supplementary Data 2

Description: Gene list of MYC signature.

File Name: Supplementary Data 3

Description: Gene list of BRCA1-mutated signature.

File Name: Supplementary Data 4

Description: Raw data supporting Figure 1C-E.
