# Supplementary material for: CX-5461 activates the DNA damage response and demonstrates therapeutic efficacy in high-grade serous ovarian cancer
Source: PubMed Central journal article supplement (PMC7251123; doi:10.1038/s41467-020-16393-4), 2020-05-26
Supplement: 41467_2020_16393_MOESM4_ESM.pdf [file 41467_2020_16393_MOESM4_ESM.pdf]

AADAT  
ADM  
AHSA1  
ALDH3B1  
ALDH6A1  
ALG8  
ANLN  
ARSD  
ASF1B  
ASPM  
ATP10B  
AURKB  
BBOX1  
BLM  
BRCA1  
BRI3BP  
BTG1  
BTG2  
C10orf119  
C10orf73  
C11orf82  
C13orf3  
C14orf145  
C15orf42  
C16orf59  
C16orf68  
C17orf41  
C1orf112  
C1orf54  
C10TNF6  
C20orf19  
C20orf82  
C4orf34  
C5orf38  
C6orf48  
CBLB  
CCDC138  
CCDC92  
CCNA2  
CCNB1  
CCNB1IP1  
CCNE1  
CD68  
CDC7  
CDCA2  
CDCA3  
CDCA5  
CDCA7  
CDCA8  
CDKN1C  
CENPJ  
CHAF1A  
CHAF1B  
CHEK1

CHRNA5  
CKB  
CPE  
CRIP2  
CRYAB  
CSE1L  
CTSC  
CYP4F3  
DAPK1  
DCC1  
DCN  
DDEFL1  
DDIT3  
DDX39  
DEPDC1  
DHFR  
DKFZp762E1312  
DLG7  
DNA2L  
DNMT1  
DONSON  
DPYSL3  
DUT  
E2F2  
EFHD2  
ESC02  
ESPL1  
EX01  
FAM134B  
FAM43A  
FAM81A  
FAM83D  
FANCI  
FBLN1  
FDPS  
FEN1  
FHOD3  
FLRT3  
FOXO3  
FXRD3  
GEMIN6  
GINS2  
GINS3  
GINS4  
GJB2  
GPM1  
HELLS  
HIST1H1C  
HIST1H2BD  
HIST2H2AA3  
HIST2H2BE  
HLA-E  
HMGB3  
HSD11B2

HSD17B8  
HSPCAL3  
HSPE1  
IL1R2  
INSIG1  
KCNB1  
KIAA0513  
KIF11  
KIF14  
KIF2C  
KLHDC9  
KNTC1  
KRT6B  
LAMB2  
LEMD1  
LHPP  
LMNB2  
LOC153222  
LOC554223  
LOC649679  
LOC729843  
LOC91431  
LOH11CR2A  
LRP8  
LYRM5  
MCM2  
MCM3  
MCM5  
MCM7  
METTL3  
MLF1IP  
MLKL  
MME  
MOSC1  
MRT04  
MSH2  
MSH6  
MSX1  
MT1G  
MTBP  
NCAPD3  
NEIL3  
NETO2  
NFE2L1  
NFIL3  
NGFRAP1  
NUP205  
OIP5  
PAQR4  
PBK  
PCNA  
PDSS1  
PDXP  
PEX11G

PHLDA3  
PKMYT1  
PLCD1  
PLEK2  
PLK4  
POLA2  
POLD1  
POLE2  
POLQ  
POLR3K  
PPIL5  
PPL  
PRC1  
PROS1  
PRPF38A  
RAD54B  
RAD54L  
RECQL4  
RFC3  
RFC4  
RFC5  
RIOK3  
RNASEH2A  
RRAGD  
RRM2  
SDCBP2  
SERTAD4  
SFPQ  
SFRS2  
SHCBP1  
SIDT2  
SLC25A10  
SLC25A13  
SLC45A3  
SPC25  
SRPK2  
ST6GALNAC2  
STAT2  
SUV39H1  
TACC3  
TAF5  
TERF1  
TIGA1  
TIMELESS  
TINF2  
TK1  
TMC4  
TMEM158  
TMEM171  
TMEM20  
TNFRSF14  
TRIP13  
TTK  
TUBA4A

TUBB2C  
TUBB4Q  
TXNIP  
TYMS  
UHRF1  
VAMP5  
VRK1  
WDHD1  
WDR79  
WIPI1  
XPC  
YPEL5  
ZBTB43  
ZNF467
